# Supplementary material for: BND-22, a first-in-class humanized ILT2-blocking antibody, promotes antitumor immunity and tumor regression
Source: PubMed Central journal article supplement — J Immunother Cancer. 2022 Sep 12;10(9):e004859. doi: 10.1136/jitc-2022-004859 (PMC9472153; doi:10.1136/jitc-2022-004859), 2022-09-12
Supplement: jitc-2022-004859supp001.pdf [file jitc-2022-004859supp001.pdf]

## BND-22, A First-in-Class Humanized ILT2-blocking Antibody, Promotes Anti-tumor Immunity and Tumor Regression

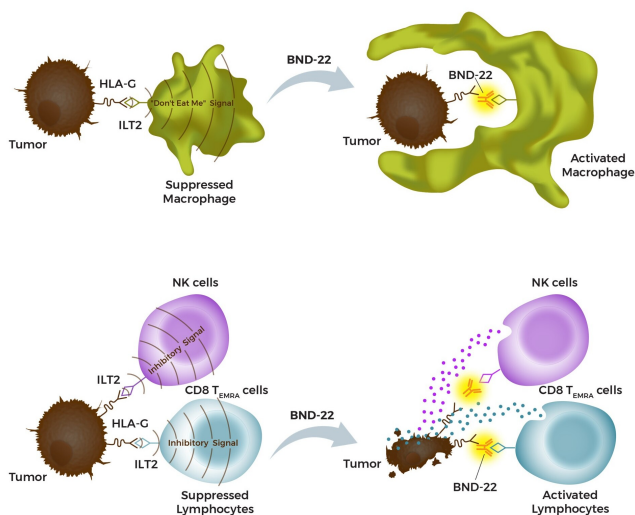

### Authors

Ilana Mandel, Dana Haves Ziv, Ilana Goldshtein, Tsur Peretz, Dror Alishekevitz, Anna Fridman Dror, Motti Hakim, Sharon Hashmueli, Itay Friedman, Yair Sapir, Rita Greco, Hongjing Qu, Frank Nestle, Dmitri Wiederschain, Lily Pao, Sharad K. Sharma, Tehila Ben Moshe

### Correspondence

ilana@biondbio.com

sharad.sharma@sanofi.com

### In Brief

BND-22 enhances the activity of innate and adaptive immune cells against tumor cells. BND-22 inhibits ILT2-HLA-G interactions, thus leading to enhanced phagocytosis by macrophages and increased cytotoxic activity of NK cells and CD8 T<sub>EMRA</sub> T cells against tumor cells.
